# Supplementary material for: MicroRNA expression profiling identifies miR-31-5p/3p as associated with time to progression in wild-type RAS metastatic colorectal cancer treated with cetuximab
Source: PubMed Central journal article supplement (PMC4770730; doi:10.18632/oncotarget.5735), 2015-10-20
Supplement: oncotarget-06-38695-s001.pdf [file oncotarget-06-38695-s001.pdf]

## SUPPLEMENTARY FIGURE AND TABLES

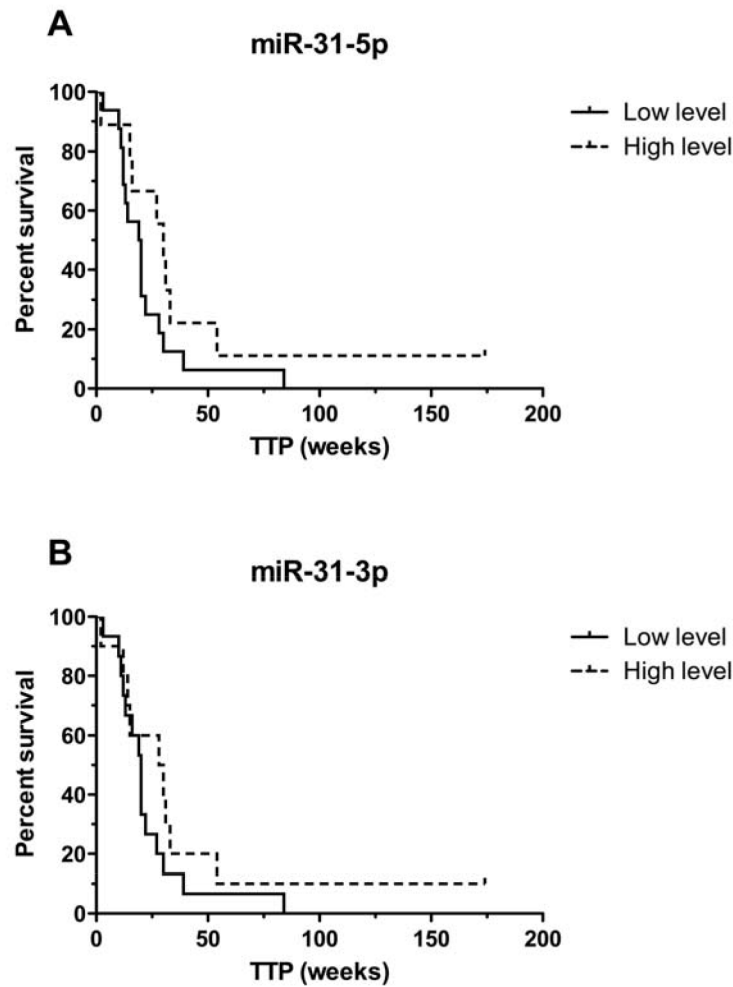

**Supplementary Figure S1: Kaplan-Meier survival curves of patients treated with panitumumab estimating TTP in weeks according to miR-31-5p and miR-31-3p expression profiles (*nonsignificant*). Patients with high expression level of relevant miRNA are illustrated by dashed line. **A.** Kaplan-Meier curve estimating TTP in weeks according to miR-31-5p expression. **B.** Kaplan-Meier curve estimating TTP in weeks according to miR-31-3p expression**

**Supplementary Table S1: Increased expression levels of miR-31-5p are associated with response to cetuximab defined by RECIST criteria (R, responders; NR, non-responders)**

| Cohort of patients         | Total R | Total NR | ↑miR-31-5p |                | P-value |
|----------------------------|---------|----------|------------|----------------|---------|
|                            |         |          | Responders | Non-responders |         |
| Exploratory – cetuximab    | 21      | 20       | 4          | 14             | 0.002   |
| Validation 1 – cetuximab   | 14      | 14       | 1          | 8              | 0.0128  |
| Exploratory + validation 1 | 35      | 34       | 5          | 22             | <0.0001 |
| Validation 2 – panitumumab | 11      | 13       | 5          | 3              | 0.3905  |

**Supplementary Table S2: MiR-31-3p and miR-31-5p validated on the validation set 2 consisted of panitumumab samples ( $N = 24$ ) and their correlation with TTP (weeks)**

| MiRNA              | Patients ( $N = 24$ ) | Median TTP (weeks) | Log-Rank $P$ | Adjusted HR | 95% CI         |
|--------------------|-----------------------|--------------------|--------------|-------------|----------------|
| MiR-31-3p          |                       |                    |              |             |                |
| Low, $\leq 0.0055$ | 14                    | 20                 | 0.2611       | 0.616       | 0.264 to 1.435 |
| High, $> 0.0055$   | 10                    | 29                 |              |             |                |
| MiR-31-5p          |                       |                    |              |             |                |
| Low, $\leq 0.12$   | 16                    | 20                 | 0.0963       | 0.483       | 0.205 to 1.139 |
| High, $> 0.12$     | 8                     | 31                 |              |             |                |

**Supplementary Table S3: List of genes significantly differently expressed between miR-31-5p mimic and negative control mimic ( $P < 0.01$ ) identified in the GeneChip® Whole Transcript (WT) Expression Arrays (Affymetrix) in three colorectal cancer cell lines (HCT-116, DLD-1 and HT-29).****Supplementary Table S4: List of genes significantly differently expressed between miR-31-5p mimic and negative control mimic ( $P < 0.01$ ) identified in the GeneChip® Whole Transcript (WT) Expression Arrays (Affymetrix) in three colorectal cancer cell lines (HCT-116, DLD-1 and HT-29) and their involvement into the biological processes (Gene ontology).**

**Supplementary Table S5: List of genes significantly differently expressed between miR-31-5p mimic and negative control mimic ( $P < 0.01$ ) identified in the GeneChip® Whole Transcript (WT) Expression Arrays (Affymetrix) in three colorectal cancer cell lines (HCT-116, DLD-1 and HT-29) and their involvement in cell signalling pathways (KEGG)**

| Pathway name                            | <i>P</i> -value | Genes                                          |
|-----------------------------------------|-----------------|------------------------------------------------|
| Chemokine signaling pathway             | 0.01598         | ADCY8, CXCL12, CXCR5, STAT3,                   |
| Jak-STAT signaling pathway              | 0.00130         | IFNL1, IL7R, IL13, STAT3, OSMR,                |
| Progesterone-mediated oocyte maturation | 0.03216         | ADCY8, MOS,                                    |
| Protein digestion and absorption        | 0.02683         | COL11A2, CTRB1,                                |
| Hematopoietic cell lineage              | 0.00521         | CSF1R, ANPEP, IL7R,                            |
| Pancreatic secretion                    | 0.00839         | ADCY8, CTRB1, ATP2A3,                          |
| Cytokine-cytokine receptor interaction  | 0.00090         | CSF1R, IFNL1, IL7R, IL13, CXCL12, CXCR5, OSMR, |
| Melanogenesis                           | 0.04654         | ADCY8, FZD1,                                   |
| Calcium signaling pathway               | 0.00251         | CHRM1, ADCY8, ATP2A3, P2RX5, RYR1,             |
| Taste transduction                      | 0.00828         | ADCY8, TAS2R20,                                |
| Mucin type O-Glycan biosynthesis        | 0.00174         | GALNT5, C1GALT1C1                              |
